# Supplementary material for: Clinically impactful metabolic subtypes of pancreatic ductal adenocarcinoma (PDAC)
Source: Front Genet. 2023 Oct 30;14:1282824. doi: 10.3389/fgene.2023.1282824 (PMC10643182; doi:10.3389/fgene.2023.1282824)
Supplement: Supplementary file 8 [file DataSheet1.xlsx]

## Sheet: Prognostic Metabolic Genes
ID	cox.coef	concordance	wald.pvalue
DPYD	0.504687	0.713095	8.70784e-05
LCLAT1	0.573318	0.647619	0.000446107
SPTLC3	0.546754	0.612302	0.000483935
DBT	0.497036	0.688492	0.000600755
HIBADH	0.406349	0.637698	0.0047621
NADK2	0.52109	0.658333	0.000496318
PYGL	0.482366	0.659127	0.000505264
SCLY	-0.583104	0.657937	0.000548046
GMPS	0.644981	0.665873	4.96563e-05
CNDP2	0.318426	0.603571	0.0247077
ELOVL5	0.474472	0.670635	0.00064641
GNG12	0.339556	0.625	0.0216799
AGL	0.416586	0.650397	0.00544872
VAPA	0.368541	0.691667	0.00304424
FADS1	0.381904	0.628571	0.00275072
ACAA2	0.411002	0.628175	0.00409232
PIK3CA	0.396631	0.659921	0.00424835
CHST11	0.427484	0.659127	0.00359352
SUMO2	0.395014	0.646825	0.0102022
ACSF3	-0.461157	0.655556	0.00847447
SLC16A1	0.347879	0.599603	0.0210848
B3GALNT1	0.526664	0.679365	0.000379229
PGM1	0.366553	0.678175	0.00336486
ARSK	0.450615	0.644048	0.00218542
PITPNM3	0.416931	0.64881	0.00333078
VCAN	0.447007	0.665476	0.0038972

## Sheet: Differentially Expressed Genes
ID	adj.P.Val	log2FC
DPYD	1.54157e-16	3.51909
TGFB2	4.35799e-07	2.90012
ENPP5	8.42984e-09	2.71647
HCG11	1.20406e-10	2.65958
HSPA4L	5.71701e-07	2.63756
ARSJ	4.80782e-09	2.58942
CPA4	8.18127e-11	2.47959
ZNF287	1.51697e-12	2.39527
SLC37A2	2.81446e-09	2.30827
MT1L	8.23167e-13	2.3051
CDK14	4.92593e-11	2.30387
ROBO1	5.69578e-08	2.2544
RECQL	9.56069e-12	2.20857
C4A	0.000154903	2.19198
ALCAM	3.40639e-07	2.17366
DDIT4L	3.38445e-08	2.16071
GLRB	5.72311e-11	2.15204
ADAMTS5	5.45861e-07	2.1439
PLEKHM3	2.11276e-10	2.12634
PPP2R3A	2.08265e-12	2.12532
MT2A	2.11092e-07	2.12276
SACS	1.9343e-11	2.11858
COL24A1	0.000111272	2.10079
MID2	8.08283e-06	2.08535
LDOC1	1.23809e-07	2.08173
MAP3K20	5.31968e-12	2.08053
DSE	6.59511e-10	2.04398
SOBP	8.30721e-06	2.03995
KIAA1586	1.99515e-10	2.03466
PAMR1	4.27901e-06	2.03184
TNFRSF19	8.3014e-10	2.02405
SPIRE1	2.86343e-07	2.02186
EGFR	1.0457e-09	2.00858
RHOBTB3	2.87191e-07	2.00551
SCRN1	1.83737e-14	1.99881
PCDHGA2	4.53244e-07	1.97069
TSPAN2	0.00140596	1.96871
LRRC37A16P	5.32307e-11	1.93767
TPPP3	0.0016938	1.93469
C22orf23	1.1097e-08	1.93178
ZNF826P	2.3547e-06	1.90475
LRRC8C	3.40639e-07	1.88898
PRNP	1.12637e-11	1.8766
TM4SF18	3.44048e-07	1.8703
SP4	7.77571e-10	1.86306
ZNF521	0.00019461	1.85937
PTPRO	3.91746e-05	1.85563
NTN4	1.64443e-08	1.85409
HIF1A	3.15877e-12	1.85256
LDLRAD3	7.06438e-11	1.84668
S100A2	0.00163431	1.84418
SLC2A5	1.75679e-05	1.83655
TEX2	1.26395e-08	1.83253
TCP11L2	2.97061e-07	1.82045
VCAM1	0.000104366	1.81723
BTBD11	1.70798e-06	1.80728
PIEZO2	3.2204e-05	1.80542
GLIS3	9.13e-06	1.79434
LAMA1	3.61124e-07	1.7932
TMEM47	1.75199e-05	1.79178
FRMD6	1.68018e-11	1.7857
MYCBP2	1.0942e-07	1.77967
GAS6-AS2	3.20403e-07	1.7775
ZNF788	2.33685e-07	1.7753
HAS2-AS1	2.09738e-07	1.77416
WRN	8.18127e-11	1.76929
MLF1	5.37094e-10	1.76794
GJA1	2.44301e-07	1.74733
RASGRP1	0.00430638	1.73697
HLA-DRB1	0.000159498	1.7247
ARL4D	9.29517e-06	1.71603
ATP11C	1.14367e-15	1.71508
KCNMB4	1.60153e-05	1.71401
FBLN7	5.55039e-05	1.70926
MITF	3.39981e-09	1.70804
HDAC9	6.89914e-07	1.70628
HDX	1.52951e-08	1.7053
PCDHB2	0.000593225	1.70436
CXorf36	1.59789e-05	1.69972
HLA-DRA	0.000507927	1.6935
PLA2G7	0.000174209	1.69202
SHPRH	7.97173e-05	1.6903
AXL	1.03901e-09	1.68919
PDZD2	0.000142783	1.68073
DCHS2	9.58732e-05	1.67541
HDGFL3	2.94314e-08	1.67106
GLI3	0.00066471	1.66802
MGAT4A	2.16816e-05	1.66646
GTF2H2	1.96284e-05	1.66385
HACD4	1.0942e-07	1.65584
LCA5	1.64659e-14	1.65181
FAM234B	1.12637e-11	1.65041
NPTXR	5.52147e-10	1.64787
SDS	8.8362e-05	1.64552
EEA1	1.39392e-09	1.64181
KCNMB1	0.00127926	1.63981
SYCP2	0.000707312	1.63952
SERPING1	1.37333e-05	1.63908
B4GALT6	0.00025691	1.63738
C3orf67	6.77596e-05	1.63732
COL6A3	4.92994e-05	1.63612
CYTH4	0.0005642	1.63501
CDC14A	8.04545e-08	1.63023
CFAP53	7.06066e-09	1.62342
EEF1A1	0.000533896	1.62333
GCNT1	0.000232522	1.62166
ZNF569	3.86643e-06	1.61852
MOCS1	2.89576e-07	1.61309
TBCEL	1.01974e-11	1.612
PCAT19	0.00029772	1.61141
MAST1	1.33564e-05	1.60954
ANOS1	8.12626e-07	1.60507
OSBPL6	9.13e-06	1.60503
NECTIN3	1.24311e-08	1.60443
TNNT1	0.00268151	1.60008
ZNF880	3.93085e-07	1.59901
COL3A1	2.49059e-07	1.59534
CDK5R1	0.000144878	1.58782
RAB30	0.000629097	1.58482
PSIP1	9.99287e-09	1.58417
COL5A2	5.14941e-06	1.58173
GYG2	1.17495e-05	1.58171
YPEL2	4.79534e-09	1.58137
HECW1	2.77261e-07	1.58045
TUBB2B	0.00162065	1.57103
CAMK4	0.00756709	1.56988
CHSY3	6.01099e-06	1.5691
FZD3	1.63103e-07	1.56532
SOCS6	4.50954e-10	1.56395
TRIM36	3.14803e-05	1.56272
PCSK5	1.26153e-05	1.55778
TRAM1L1	1.99709e-08	1.5577
B3GALNT2	4.97052e-09	1.55042
CRLF1	0.000183016	1.54926
BTF3L4P2	2.82134e-13	1.54919
STXBP4	1.0047e-08	1.54743
SRGAP3	2.39437e-06	1.53962
TLR1	4.73843e-06	1.53566
CITED2	3.15961e-05	1.53303
PITPNC1	5.30513e-09	1.52989
FBXO30	4.23155e-07	1.52861
STK32B	0.000186174	1.52201
SLC30A4	2.91661e-08	1.52032
NIN	7.71858e-08	1.51541
ZNF271P	2.09742e-08	1.50358
ANXA1	4.38199e-06	1.50258
ARG2	3.16042e-09	1.50239
USP37	5.51446e-09	1.4985
UTRN	1.67719e-06	1.49606
PYGL	1.22382e-07	1.49451
CDYL2	2.21752e-05	1.49165
LINC02535	4.61645e-06	1.49124
CSDC2	0.000256813	1.48927
CLIC4	3.97181e-11	1.48707
CLDN16	2.38794e-05	1.48643
KLF10	2.08265e-12	1.48421
MT1F	4.70746e-05	1.48137
CD163L1	0.00060458	1.48082
MED13L	1.0047e-08	1.47597
ECSCR	0.00192901	1.47329
KLHL5	1.43953e-09	1.47318
NMRAL2P	3.90464e-06	1.47112
TRPC6	0.000108596	1.46857
VCAN	1.09807e-09	1.46758
ZNF189	0.000161405	1.46614
KANSL1-AS1	5.35929e-05	1.46152
PHLPP2	8.00779e-05	1.45579
KCNQ3	2.60737e-06	1.45405
MPP7	0.000480716	1.45335
DRP2	1.86417e-05	1.45324
ZNF132	2.89576e-07	1.45305
ERFE	2.52626e-07	1.44939
PRICKLE1	6.59511e-10	1.44917
ZNF304	4.73388e-05	1.44802
NECAB1	1.443e-05	1.44396
CPEB4	5.28504e-10	1.44243
PKD1P5	1.44836e-05	1.43923
HSPA2	3.85996e-05	1.43867
CDIP1	5.61366e-06	1.43738
ATL1	8.4307e-12	1.43495
IL17RD	1.20406e-10	1.43042
LINC00654	0.000115566	1.42986
CHD9	9.54743e-08	1.42957
JPH2	0.0001355	1.42881
DNAH7	1.18654e-05	1.42608
COL1A2	2.38794e-05	1.42396
KCNJ2	0.000110573	1.42381
ABCA3	0.000292985	1.42226
BAALC-AS1	5.89172e-05	1.42124
MRVI1	0.00010898	1.41756
SMCR8	2.69951e-06	1.41746
DNM1	0.00115936	1.41663
C17orf107	2.08699e-06	1.41204
DENND5B	1.75199e-05	1.41197
UHRF1BP1L	3.97181e-11	1.41088
PIK3R3	7.74253e-07	1.4101
LINC01410	2.03622e-06	1.40169
PCDHGB6	1.51266e-05	1.40001
ITGB1	0.000569079	1.39971
CDC40	4.50954e-10	1.39645
UNC119B	6.93789e-08	1.39543
GPR155	0.000107197	1.39487
PODXL2	0.000699225	1.39261
CEP19	5.51446e-09	1.39048
GSTA4	1.63112e-05	1.3872
MAGEE1	1.93222e-06	1.38359
MVB12B	0.000487095	1.38178
RNF212	0.00176332	1.38142
BCAM	7.12798e-05	1.37646
SGMS2	4.69575e-06	1.37618
ENPEP	6.56239e-06	1.37532
LRP4	0.00283117	1.37522
HSPA8	1.52818e-07	1.37373
PGAP1	0.000587448	1.37354
CD274	4.44709e-05	1.36837
AMOTL1	2.78437e-07	1.36682
MPHOSPH9	1.98422e-08	1.36234
CAMK2N2	2.7416e-05	1.36103
HIPK2	1.66868e-05	1.36087
BPI	0.000213366	1.35931
PLOD2	1.69622e-05	1.35744
C3orf70	0.0146527	1.35573
ULK2	2.6335e-08	1.35343
IRAK1BP1	2.44112e-07	1.35239
SMARCA1	2.3904e-11	1.35005
LCA5L	3.48659e-06	1.34938
UGDH	1.12529e-12	1.34892
ANKRD28	2.39875e-07	1.34831
RASGEF1A	5.95386e-06	1.34677
LAMP3	0.00111437	1.34467
FADS2	0.000479941	1.34353
ETS1	1.40799e-06	1.34144
ETNK2	3.52975e-11	1.34053
GCLC	1.28738e-07	1.33676
FCGR1A	4.77404e-05	1.33388
CXCL1	0.0056879	1.33207
ICE1	9.22379e-08	1.33046
ERCC4	2.69921e-06	1.32874
WASF1	1.96681e-09	1.32708
GATS	8.14076e-05	1.32699
GAREM1	7.44284e-06	1.32575
TUBB6	4.374e-08	1.32182
SNPH	0.000809926	1.32006
SGCE	3.46866e-07	1.31674
LINC01235	0.000135047	1.31537
MMP2	6.22519e-05	1.31346
IPO11	9.91918e-08	1.31118
CLSPN	1.9256e-09	1.30912
LTBP1	0.000281614	1.30704
PDZRN3	0.00637292	1.30698
CBARP	0.000294655	1.30632
PARVB	3.35632e-10	1.30629
ESF1	1.7066e-06	1.30605
NOMO2	1.56727e-06	1.30364
CRYAB	0.0061496	1.30325
WWC2	6.83896e-09	1.30255
STOM	0.000252752	1.3017
UTP23	1.25151e-07	1.3012
DCHS1	0.0141516	1.30082
GASAL1	3.0255e-06	1.29293
ATP10D	1.56486e-10	1.29224
OXTR	2.8292e-05	1.28929
PSMG3-AS1	3.68751e-06	1.28711
TMED5	3.6568e-14	1.28665
ZNF439	0.000417131	1.28438
NEURL1B	0.000212976	1.28294
SFTPD	6.14994e-06	1.27931
GPR176	4.00255e-06	1.27868
RNF217	8.44838e-08	1.27368
TMEM67	2.64212e-05	1.27317
TREM1	0.000957649	1.27049
ZNF90	0.00216417	1.26853
KIF2A	2.23781e-08	1.26209
PAG1	0.000718807	1.26203
TRAPPC8	1.50519e-05	1.26065
GFOD1	1.00286e-05	1.25981
LRRC37A17P	6.23389e-05	1.25923
LGI4	0.0116961	1.25875
AKAP12	0.0390018	1.25684
CCDC88A	4.84391e-07	1.25195
HDHD2	4.41049e-07	1.2499
DENND4C	3.01322e-05	1.24807
MANEA	2.69951e-06	1.24442
DMXL1	3.8906e-07	1.24296
FAM160A1	1.9343e-11	1.24216
ADRA2C	0.000834558	1.24052
CCDC113	7.80254e-05	1.2385
TOPORS	0.000189478	1.23802
CMYA5	0.00450142	1.23749
FOSL1	0.00134583	1.2367
TGFBR2	1.08359e-07	1.23633
TOGARAM1	2.18624e-08	1.23493
MORF4L1P1	9.59055e-07	1.23493
PRKDC	2.62339e-08	1.23484
SLC45A1	4.54465e-07	1.23152
LMO2	0.000164518	1.22894
ZFP69B	6.33598e-06	1.22661
GNAI1	3.49263e-06	1.22498
HMGN5	3.99785e-05	1.22352
KCNC3	0.00102123	1.22271
PAQR3	1.39392e-09	1.22075
JMY	1.26395e-08	1.21778
PIK3CD-AS2	4.22497e-05	1.2147
SLC39A6	2.85922e-12	1.21435
APBA1	1.22498e-05	1.21353
ITGA5	0.000465048	1.21158
WDR31	1.81259e-10	1.21139
ZNF608	1.71937e-05	1.2074
ZNF583	3.71692e-06	1.20652
PTGS1	1.39666e-06	1.20487
CERS4	0.0440169	1.20033
SPSB4	0.00532201	1.20003
SPTLC3	1.28252e-09	1.19654
RASSF9	0.000239195	1.19599
KCNIP3	0.0019679	1.19568
CLIC5	0.0264072	1.19382
KATNAL2	0.000216681	1.19336
PTPRG	1.77278e-07	1.18813
LRRC25	0.0101503	1.1879
SLC2A13	0.00193555	1.18448
FADS1	4.97622e-12	1.18349
SLFN5	0.000106813	1.18254
KATNAL1	7.10815e-11	1.18097
A2M	8.7459e-05	1.18063
PLBD1-AS1	6.58354e-10	1.18013
PIK3AP1	0.00434854	1.17858
FITM2	9.2776e-09	1.17805
C11orf45	2.06397e-05	1.17471
BEX4	0.00178552	1.17386
WDR78	1.18488e-06	1.17252
CPAMD8	0.00023933	1.17111
CSGALNACT1	1.45332e-07	1.17106
MGST1	1.98422e-08	1.17047
CD300A	3.7501e-05	1.16932
ATG4C	3.74605e-08	1.16746
PPM1L	2.88529e-07	1.16343
HLA-DMB	0.0147348	1.16242
CAB39L	1.13471e-05	1.15885
FAM86DP	0.00015306	1.15394
SETD7	1.96201e-09	1.15193
FAM8A1	1.43243e-05	1.14994
VEGFC	2.78437e-07	1.14986
FAM46B	0.000533245	1.14886
FGF18	0.0078781	1.14857
LOH12CR2	4.54465e-07	1.14835
RGS11	0.0197115	1.14775
RPH3AL	0.00024554	1.14701
MFAP3L	4.72383e-07	1.14685
TBX3	6.6021e-05	1.14634
NBEAL1	4.98744e-08	1.14627
DOCK3	2.79662e-05	1.14601
AFAP1L1	1.17089e-06	1.14452
RND2	6.74293e-05	1.14176
SCPEP1	6.43881e-07	1.14158
PI4KAP1	0.000596416	1.13926
ASCC3	3.30849e-08	1.13854
ROCK1	1.5874e-05	1.1363
TXNDC5	0.00341486	1.13583
HERC1	4.28171e-08	1.13512
CTSV	0.00101041	1.13343
RAG1	0.000314036	1.13295
JADE1	1.94446e-05	1.13147
ATP2B1	8.31709e-09	1.13046
REL	1.69902e-06	1.12994
C3orf80	0.00285283	1.1276
SLC16A14	1.33262e-06	1.12697
ZNF391	0.000196032	1.1268
NFATC3	6.97086e-09	1.12314
ASXL2	1.9343e-11	1.11985
ACAN	0.00189348	1.11898
ZHX3	5.51446e-09	1.11809
ARSK	5.37094e-10	1.11743
PGBD5	0.0061332	1.11715
AIF1	0.00200552	1.11688
DPF1	1.09807e-09	1.1146
NR2F2-AS1	1.00351e-05	1.11459
WASHC4	3.13058e-05	1.11348
RPL7P1	0.000283505	1.11238
CCDC163	1.75759e-05	1.11181
KIF3C	9.67337e-09	1.10993
THBS2	5.9886e-05	1.10965
ADAM17	2.87343e-07	1.10602
KIF21A	2.07775e-07	1.10427
CDNF	0.001384	1.10408
PBX3	1.04842e-07	1.10357
TOGARAM2	0.00762325	1.10316
ZFYVE9	1.84871e-06	1.10164
CYB5RL	1.52534e-05	1.1016
PRKAG2-AS1	0.00335645	1.10103
RPL21P28	0.000214478	1.10033
RIMKLA	0.0060544	1.09912
SYNDIG1	0.00077351	1.09823
LINC00674	4.80336e-07	1.09759
SYTL3	0.000288491	1.0975
TCEAL7	0.000151304	1.09485
BACE1	0.00366042	1.09441
TTC28	7.09792e-07	1.09427
NR3C1	1.34463e-10	1.09426
C6orf141	0.000458515	1.09321
C16orf74	0.0198365	1.09262
CES4A	0.000712868	1.09231
SIGLEC9	0.000563795	1.09005
GPAT3	1.88963e-06	1.08935
CENPBD1	6.14848e-07	1.08922
MCC	6.97819e-09	1.08706
VWF	3.1317e-05	1.08595
CALD1	0.000193956	1.08594
GJC1	0.00435348	1.08444
FECH	1.77752e-07	1.08326
WFDC1	0.000394785	1.08301
PTGER2	0.010957	1.08054
MAST4	5.98109e-06	1.07911
RNF157	0.00056151	1.07909
CEP97	1.73067e-06	1.07611
AK7	0.00029629	1.07595
TNFRSF10C	0.00659546	1.07585
TMEM38B	7.78331e-08	1.07255
PCDHB7	1.35636e-06	1.0718
THBD	0.000406196	1.07175
KIF27	1.20144e-08	1.07123
ZNF544	0.00194748	1.06938
INTS2	1.07059e-07	1.06914
AIG1	2.88529e-07	1.068
HSPA13	1.39392e-09	1.06759
DNAJC27-AS1	1.07785e-06	1.06635
GAS2L3	0.00673848	1.06509
C4orf47	0.0004519	1.06461
GPR84	1.00193e-05	1.06435
SLC39A8	0.00927844	1.06419
MBP	1.4548e-07	1.06378
KLLN	1.60181e-05	1.06309
SLC38A2	1.52126e-07	1.06284
HCN2	2.49283e-05	1.06281
ZRANB1	6.59351e-08	1.06278
THAP12	4.53543e-06	1.06196
BDP1	1.23658e-05	1.06191
LRRC73	9.3163e-05	1.05991
CALHM5	2.21024e-05	1.05976
RB1CC1	6.19428e-07	1.05799
ALDH5A1	2.10599e-05	1.0579
FOXF1	0.00610207	1.05558
KHDRBS3	0.00109178	1.05554
FLVCR2	0.000691313	1.05466
LINC00476	0.000110435	1.05435
CELSR2	9.21115e-06	1.05365
HERC5	0.000219563	1.05338
MAN1A2	1.08588e-08	1.05296
DZIP1	9.05157e-05	1.05273
VSTM4	0.000111709	1.05086
SOAT1	3.48386e-06	1.04831
OPHN1	6.67175e-06	1.04576
MYC	7.24342e-05	1.04566
SUSD2	0.000193336	1.04422
MFSD4A	0.030872	1.04335
THAP1	1.88963e-06	1.04094
GBE1	1.24474e-05	1.04049
NXPH4	0.000394544	1.04001
BOLA3-AS1	6.3699e-08	1.03944
PTPRM	2.9471e-05	1.03708
EVA1A	1.19743e-06	1.03672
CHST11	3.0071e-07	1.03661
NUDT11	1.13201e-05	1.03637
PAPD5	1.44127e-10	1.03622
TMEM254-AS1	1.69622e-05	1.03413
FMNL1	0.00394482	1.0338
ATP13A3	1.9343e-11	1.03261
CAPN7	7.35782e-06	1.03253
FTH1P11	2.70697e-05	1.03187
LEMD3	0.000283505	1.03014
DSG2	5.32526e-08	1.02931
TSR1	2.05886e-10	1.02887
NT5E	0.0047717	1.0283
MMRN2	0.00336408	1.02738
UBE2E2	2.42866e-06	1.02686
SMG6	6.01487e-05	1.02554
ZNF615	1.3537e-06	1.02509
SLC13A3	0.000451678	1.02427
ZBTB21	5.93473e-06	1.02405
NRP1	2.65434e-08	1.02349
CLEC2D	0.0162955	1.02314
RPL35P1	6.23389e-05	1.02219
CD83	0.00686797	1.02187
CLCN5	0.000195641	1.02166
BASP1	0.00113487	1.02159
SIK3	6.93576e-07	1.01901
ARL13B	2.92809e-06	1.01892
ODC1	0.0013311	1.01804
ANKFY1	1.48043e-08	1.01654
NBN	1.28049e-06	1.01606
ARMCX1	1.63112e-05	1.01309
GRIK2	0.000417369	1.01267
TANC2	1.0047e-08	1.01262
FAM102B	2.24643e-06	1.01239
CFB	0.000319672	1.01229
SULT1A2	8.51122e-05	1.01194
SRR	0.000252237	1.01093
KCNIP4	0.000233254	1.00693
TTC25	4.5199e-06	1.00407
FAM3C2	0.00527325	1.0039
ZBTB38	2.5429e-06	1.00332
MBNL1	4.89617e-06	1.0023
C4orf48	0.0120563	-1.0013
FAM193B	1.64919e-07	-1.01002
SPPL2B	1.0047e-08	-1.01424
ADAP1	1.21757e-06	-1.02291
ASPHD2	0.000184408	-1.028
MMP11	0.00497773	-1.03612
PRDM8	6.99073e-05	-1.03804
BAIAP2L2	0.00366725	-1.04496
C20orf204	0.00032745	-1.046
GSDMB	2.08699e-06	-1.04641
PLAC8	0.0200991	-1.05771
PRR22	0.00220716	-1.06191
ITPKA	0.00143663	-1.06967
SLC5A2	0.00015306	-1.0701
IRX5	0.00158763	-1.07205
TPGS1	0.00468638	-1.07279
GPR37L1	0.00185377	-1.07598
GRP	0.00702146	-1.07946
ATP6V0D2	0.0261116	-1.08955
ASIC3	3.84972e-05	-1.09085
LMNTD2	4.30861e-05	-1.10605
TNS4	0.017985	-1.11109
VSIG2	0.00142182	-1.1175
BICDL1	2.53452e-06	-1.11999
PCSK4	1.42202e-05	-1.13007
CAPN8	0.00077674	-1.13404
TRIM31	0.0130356	-1.13577
TEX22	4.22076e-05	-1.14287
POU5F1	0.00782801	-1.14577
CXCL3	0.017701	-1.14925
ADAT3	7.37088e-05	-1.15893
GPR35	1.68684e-05	-1.16335
CRACR2B	2.60068e-06	-1.16954
AOC1	0.00151923	-1.17453
EPS8L3	0.018542	-1.17959
CYP2S1	0.0066265	-1.18601
HOXA10	0.051927	-1.18726
PLA2G10	0.00441506	-1.20202
C6orf223	0.000109966	-1.21412
TNFRSF4	3.6265e-05	-1.24038
NOXA1	3.40936e-06	-1.24664
EXOC3L4	0.000484317	-1.2532
IL2RG	0.000650564	-1.25331
IL4I1	0.00118564	-1.26396
C1QTNF12	2.94972e-05	-1.31402
SHISA2	0.000227605	-1.3696
CTSE	0.00817999	-1.37099
SLC26A9	0.00990138	-1.68728
NR1I2	0.00507651	-1.95845
CLDN18	0.0225159	-2.14744
